# Supplementary material for: A dual-functional additive improves the performance of molecular bulk heterojunction photovoltaic cells
Source: Royal Society of Chemistry journal article supplement (doi:10.1039/c3ra46884d), 2013-12-09
Supplement: c3ra46884d.pdf [file c3ra46884d.pdf]

## Supporting Information

### **A dual-functional additive improves the performance of molecular bulk heterojunction photovoltaic cells**

**Mahmoud E. Farahat<sup>a,b,c</sup>, Hung-Yu Wei<sup>d</sup>, Mohammed Aziz Ibrahim<sup>b,c,e</sup>, Karunakara Moorthy<sup>a,b</sup>, Kung-Hwa Wei<sup>f</sup>, and Chih-Wei Chu<sup>\*b,g</sup>**

<sup>a</sup>Department of Engineering and System Science, National Tsing-Hua University, Hsinchu 30013, Taiwan (ROC)

<sup>b</sup>Research Center for Applied Sciences, Academia Sinica, Taipei 115, Taiwan.

<sup>c</sup>Nanoscience and Technology Program, Taiwan International Graduate Program, Academia Sinica, Taipei 115, Taiwan (ROC)

<sup>d</sup>Institute of Polymer Science and Engineering, National Taiwan University, Taipei, 10617, Taiwan (ROC)

<sup>e</sup>Department of Physics, National Taiwan University, Taipei 106, Taiwan (ROC)

<sup>f</sup>Department of Materials Science and Engineering, National Chiao Tung University, 1001 Ta Hsueh Road, Hsinchu, 30050, Taiwan (ROC).

<sup>g</sup>Department of Photonics, National Chiao Tung University, Hsinchu 300, Taiwan (ROC)

\*Corresponding author: Dr. Chih-Wei Chu, E-mail: gchu@gate.sinica.edu.tw

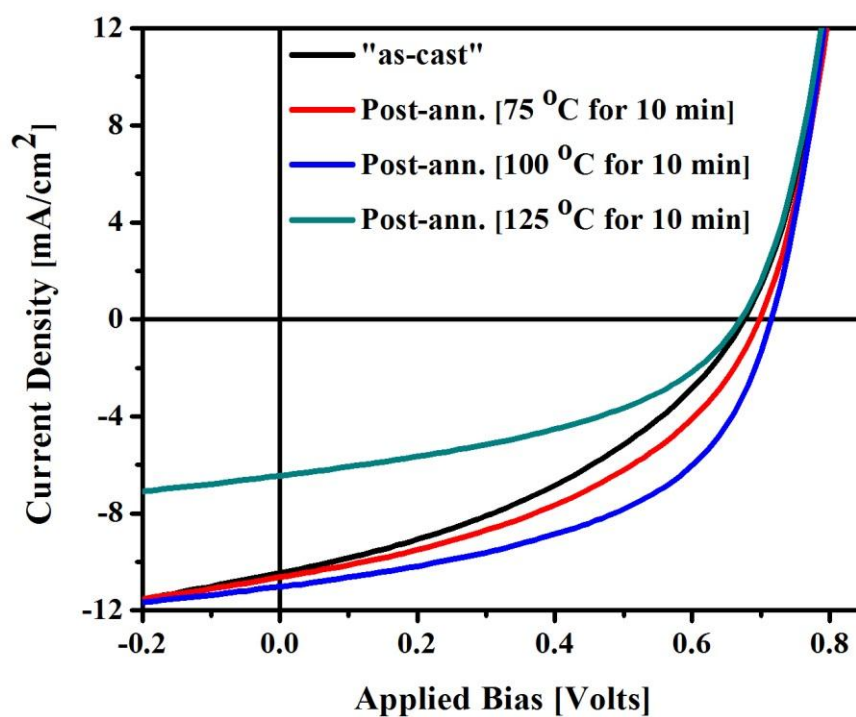

**Figure S1.**  $J$ – $V$  characteristics of devices prepared without the additive and subjected to different post-annealing temperatures.

**Table S1.** Photovoltaic characteristics of devices prepared without the additive and subjected to different post-annealing temperatures.

| Annealing Temp.<br>[°C] | $J_{sc}$<br>[mA/cm <sup>2</sup> ] | $V_{oc}$<br>[V] | FF<br>[%] | PCE<br>[%] |
|-------------------------|-----------------------------------|-----------------|-----------|------------|
| “as-cast”               | 10.46                             | 0.68            | 38.66     | 2.75       |
| 75°C                    | 10.60                             | 0.70            | 42.45     | 3.15       |
| 100 °C                  | 10.20                             | 0.71            | 48.33     | 3.50       |
| 125°C                   | 6.45                              | 0.67            | 43.04     | 1.86       |

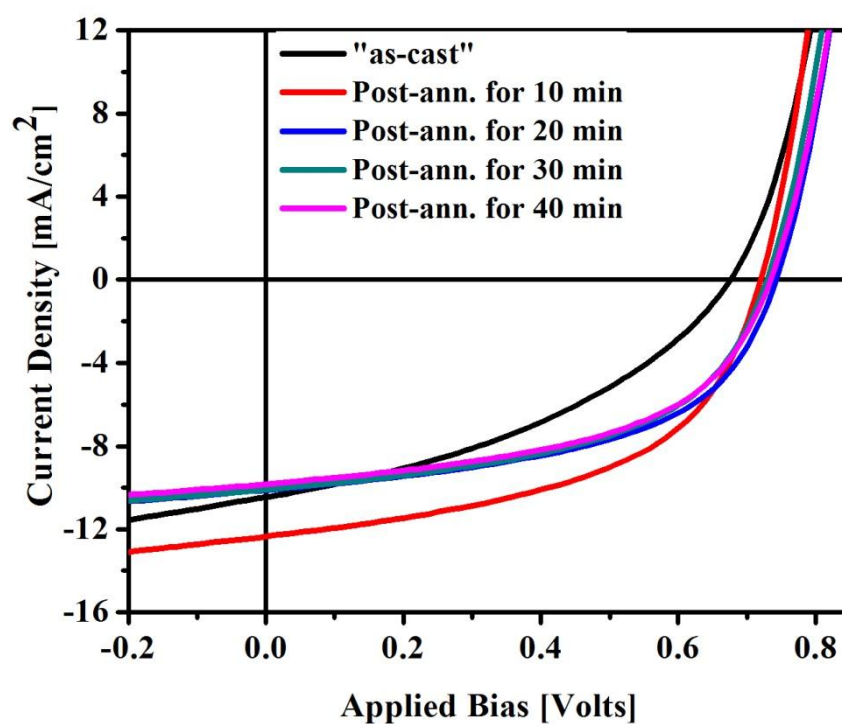

**Figure S2.**  $J$ – $V$  characteristics of devices prepared with 0.1% of the additive CP3MS and post-annealing at 100 °C for different lengths of time.

**Table S2.** Photovoltaic characteristics of devices incorporating 0.1% of the additive that had been subjected to post-annealing at 100 °C for different lengths of time.

| Annealing Time<br>[min] | $J_{sc}$<br>[mA/cm <sup>2</sup> ] | $V_{oc}$<br>[V] | FF<br>[%] | PCE<br>[%] |
|-------------------------|-----------------------------------|-----------------|-----------|------------|
| “as-cast”               | 10.46                             | 0.68            | 38.66     | 2.75       |
| 10                      | 12.36                             | 0.72            | 51.14     | 4.55       |
| 20                      | 10.13                             | 0.74            | 52.43     | 3.93       |
| 30                      | 10.09                             | 0.73            | 51.45     | 3.79       |
| 40                      | 9.85                              | 0.73            | 51.87     | 3.73       |

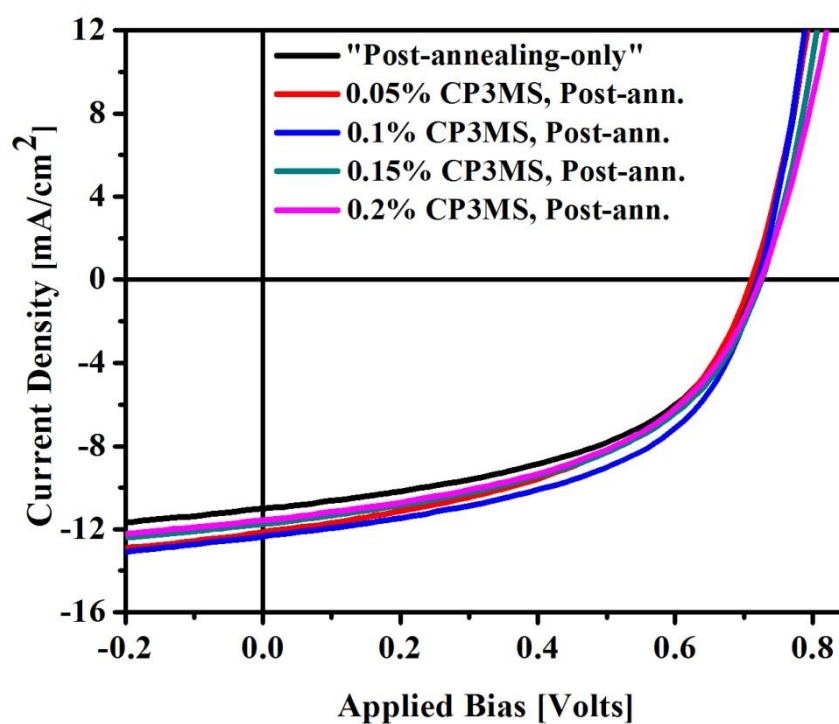

**Figure S3.**  $J$ - $V$  characteristics of devices prepared with different CP3MS concentrations and post-annealing at 100 °C for 10 min.

**Al-cathode smoothly removed**

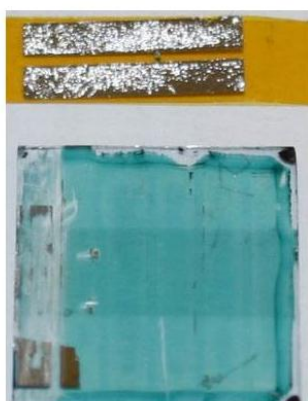

**Post-annealed device**

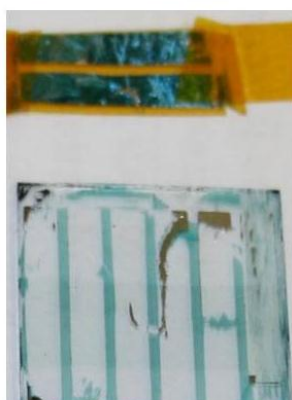

**Device without Post annealing**

**Active layer attached  
with Al-cathode after  
peel-off**

**Figure S4.** Digital camera images showing the effect of post-annealing treatment on the interface between the active layer and the metal cathode.

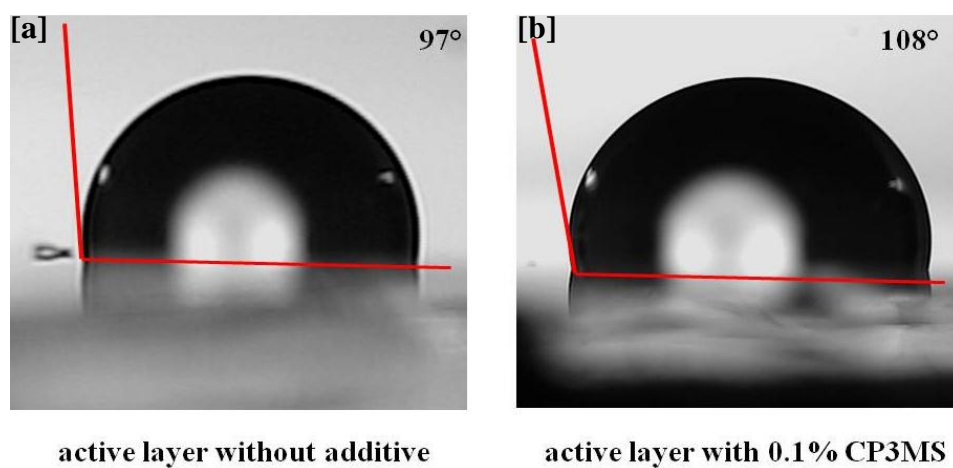

**Figure S5.** Images of contact angles of active layers without additive (a) and with 0.1% CP3MS additive (b)



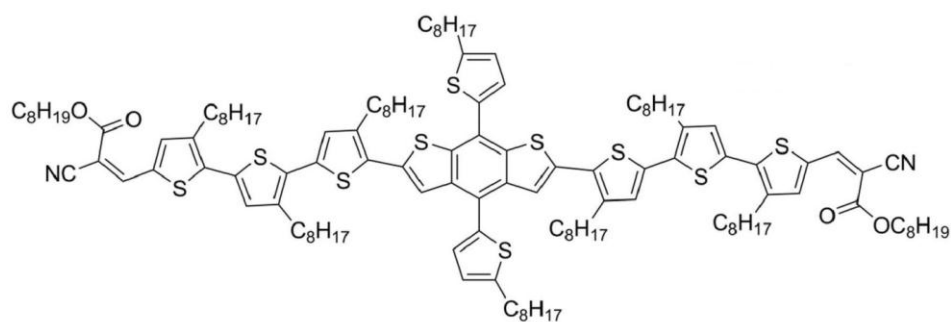

**Scheme S1.** Chemical structure of benzodithiophene (BDT)-based molecule (TBDTCNR)

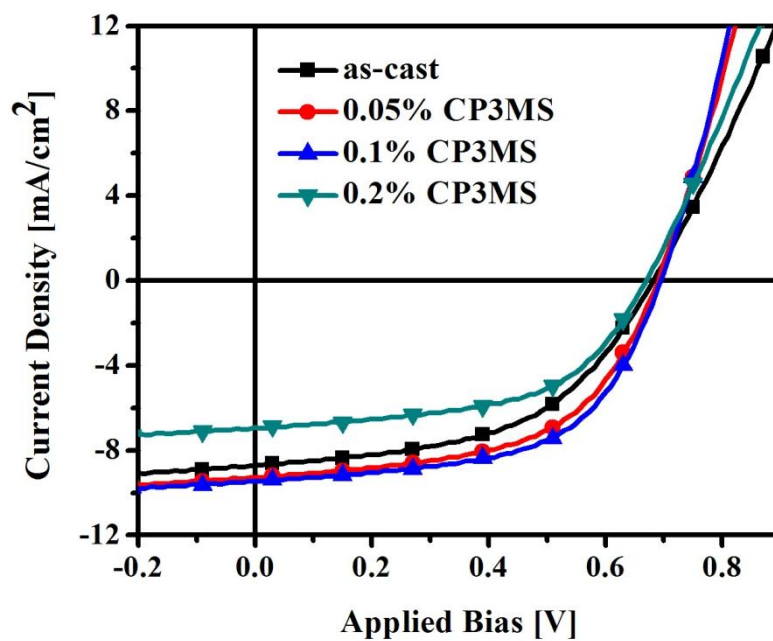

**Figure S6:** *J*–*V* characteristics of devices prepared with different CP3MS concentrations for benzodithiophene (BDT)-based molecule (TBDTCNR)

**Table S3.** Photovoltaic characteristics of devices prepared with different CP3MS concentrations for benzodithiophene (BDT)-based molecule (TBDTCNR).

| Additive Conc.<br>[%] | $J_{sc}$<br>[mA/cm <sup>2</sup> ] | $V_{oc}$<br>[V] | FF<br>[%] | PCE<br>[%] |
|-----------------------|-----------------------------------|-----------------|-----------|------------|
| “as-cast”             | 8.70                              | 0.68            | 51.56     | 3.05       |
| 0.05% CP3MS           | 9.26                              | 0.69            | 55.25     | 3.53       |
| 0.10% CP3MS           | 9.46                              | 0.70            | 57.38     | 3.80       |
| 0.20% CP3MS           | 6.92                              | 0.67            | 55.22     | 2.56       |
